# Supplementary material for: Ginger-derived compounds exert in vivo and in vitro anti-asthmatic effects by inhibiting the T-helper 2 cell-mediated allergic response
Source: PubMed Central journal article supplement — Exp Ther Med. 2021 Nov 15;23(1):49. doi: 10.3892/etm.2021.10971 (PMC8652391; doi:10.3892/etm.2021.10971), 2021-11-15

Figure S1. Cytotoxicity assay of SHO and GIN in the Jurkat and RBL-2H3 cell lines. Jurkat and RBL-2H3 cells were maintained with RPMI-1600 medium and MEM. Jurkat cells ( $1 \times 10^4$ ) were transferred and incubated in a 96-well plate with (A) SHO (0, 10, 50 and 100 nM) or (B) GIN (0, 10, 50 and 100 nM) for 0, 24, 48 and 72 h. RBL-2H3 cells ( $5 \times 10^3$ ) were transferred and incubated in a 96-well plate with (C) SHO (0, 1, 2.5 and 5  $\mu$ M) and (D) GIN (0, 0.5, 1 and 2  $\mu$ M) for 0, 24, 48 and 72 h. Cell viability assays (Cell Counting Kit-8) were performed to evaluate the non-toxic concentrations of SHO and GIN in Jurkat and RBL-2H3 cells. Values are presented as the mean  $\pm$  SD. \* $P < 0.05$ , \*\*\* $P < 0.001$  vs. OVA group. OVA, ovalbumin; SHO, 6-shogaol; GIN, 6-gingerol; OD, optical density.

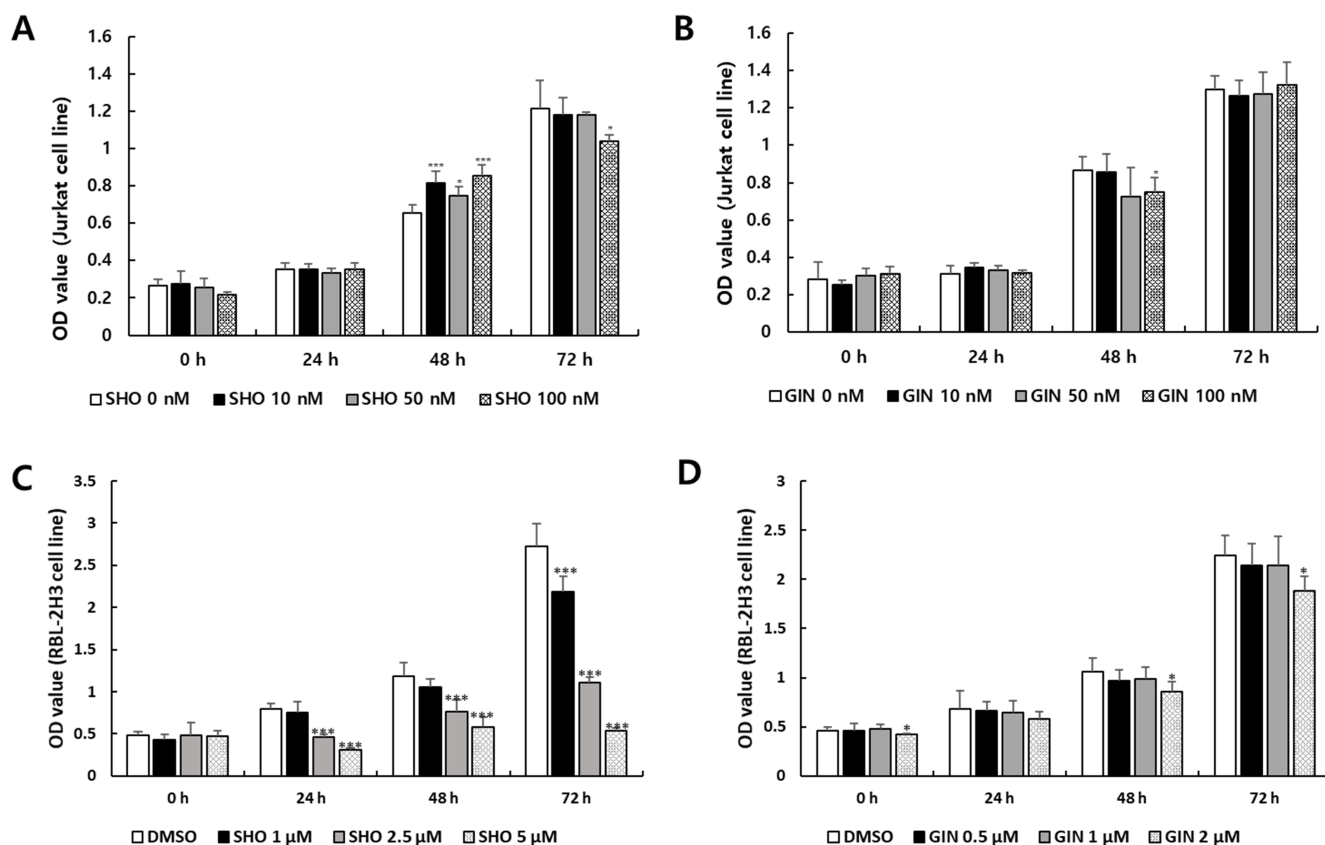

Supplement: Supplementary_Data.pdf [file Supplementary_Data.pdf]
